# Supplementary material
Source: Springer Nature journal article supplement (https://www.springermedizin.de/resource/supplementary/12888_2014_1648_MOESM2_ESM.pdf/9481094)
Supplement: MOESM2 [file 9481094]

### Latency

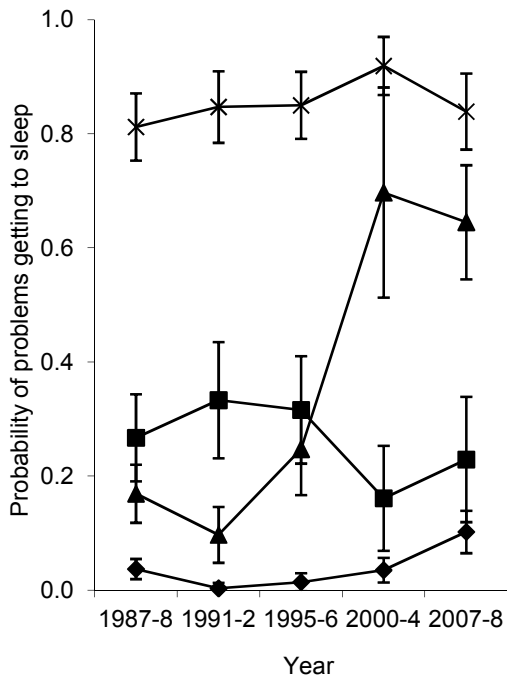

### Maintenance

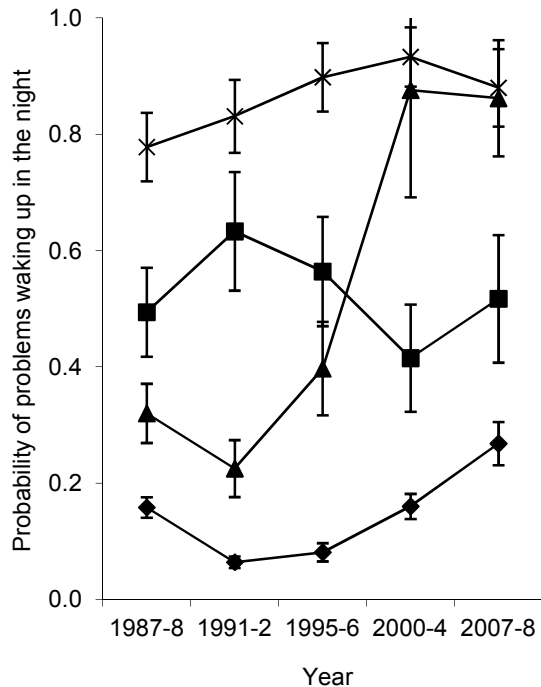

◆ Healthy Class

■ Episodic Maintenance Class

▲ Developing Class

× Chronic Mixed Class
